# Supplementary material for: Theoretical investigation on the atmospheric degradation mechanism, kinetics, and fate of hydroxymethyl nitrate initiated by ˙OH radicals
Source: Royal Society of Chemistry journal article supplement (doi:10.1039/d3nj01628e), 2023-01-01
Supplement: d3nj01628e1.pdf [file d3nj01628e1.pdf]

**Supporting Information for:**

**Theoretical investigation on the atmospheric degradation mechanism,  
kinetics, and fate of hydroxymethyl nitrate initiated by ·OH radical**

Xiang-Huan Liu<sup>a</sup>, Ting-Ting Meng<sup>a</sup>, Feng-Yang Bai<sup>a\*</sup>, Shuang Ni<sup>a\*</sup>, Zhen Zhao<sup>a,b\*</sup>

<sup>a</sup>*Institute of Catalysis for Energy and Environment, College of Chemistry and Chemical Engineering, Shenyang Normal University, Shenyang, 110034, People's Republic of China*

<sup>b</sup>*State Key Laboratory of Heavy Oil Processing, China University of Petroleum, Chang Ping, Beijing 102249, People's Republic of China*

---

\*Corresponding author: [baify492@nenu.edu.cn](mailto:baify492@nenu.edu.cn) (Feng-Yang Bai)

\*Corresponding author: [nis223@nenu.edu.cn](mailto:nis223@nenu.edu.cn) (Shuang Ni)

\*Corresponding author: [zhenzhao@cup.edu.cn](mailto:zhenzhao@cup.edu.cn) (Zhen Zhao)

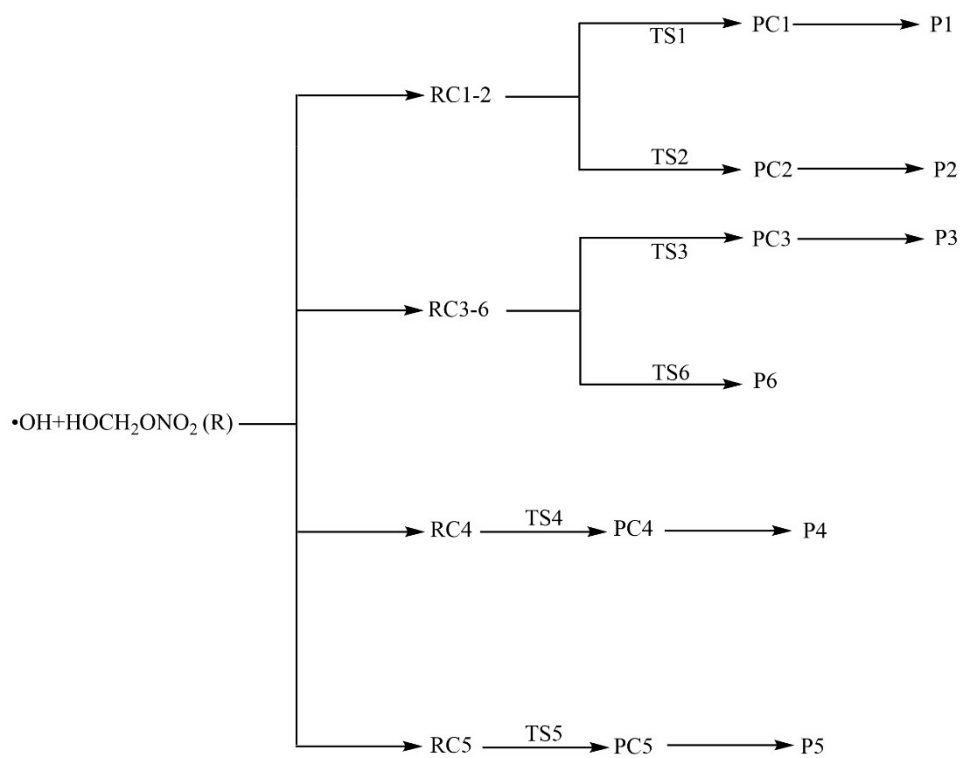

**Figure S1.** The reactions routes of HOCH<sub>2</sub>ONO<sub>2</sub> mediated by the ·OH radical.

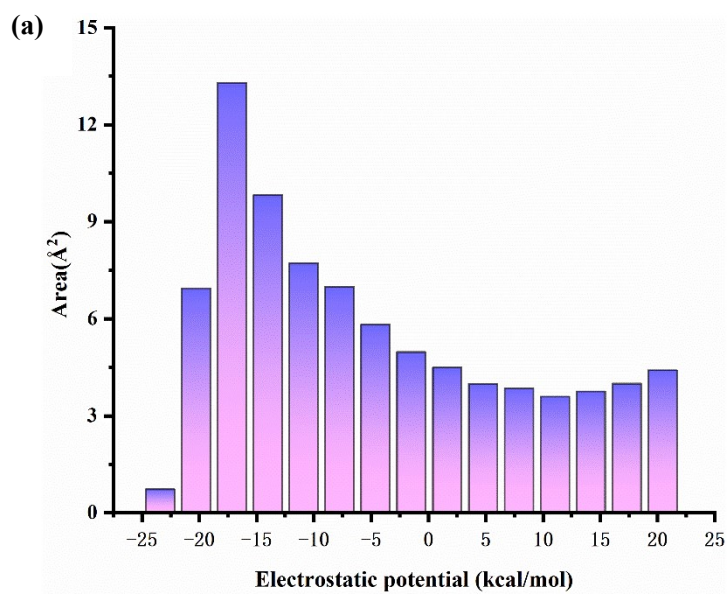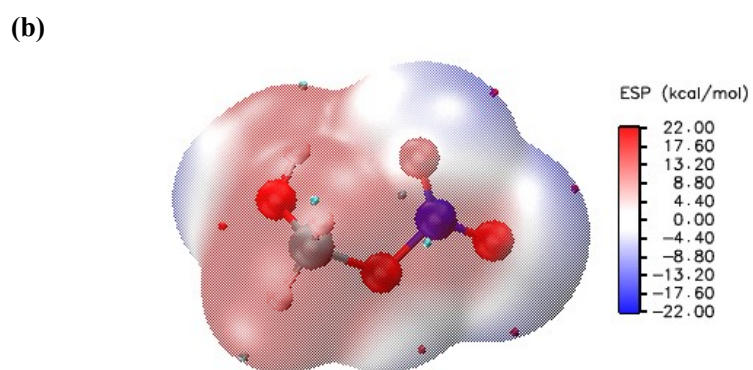

**Figure S2.** The electrostatic potential on the surface of HOCH<sub>2</sub>ONO<sub>2</sub> molecule and its bar graph.

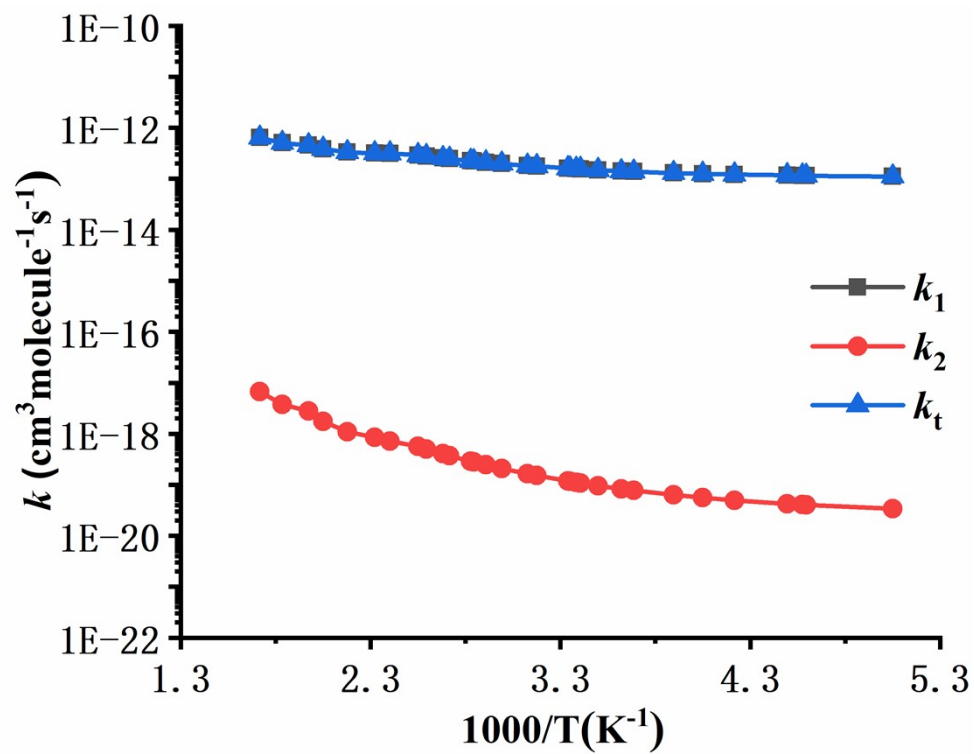

**Figure S3.** Plots of calculated individual and overall CVT/SCT rate constants ( $k_1$ ,  $k_2$ , and  $k_t$ ) as a function of  $1000/T$ .

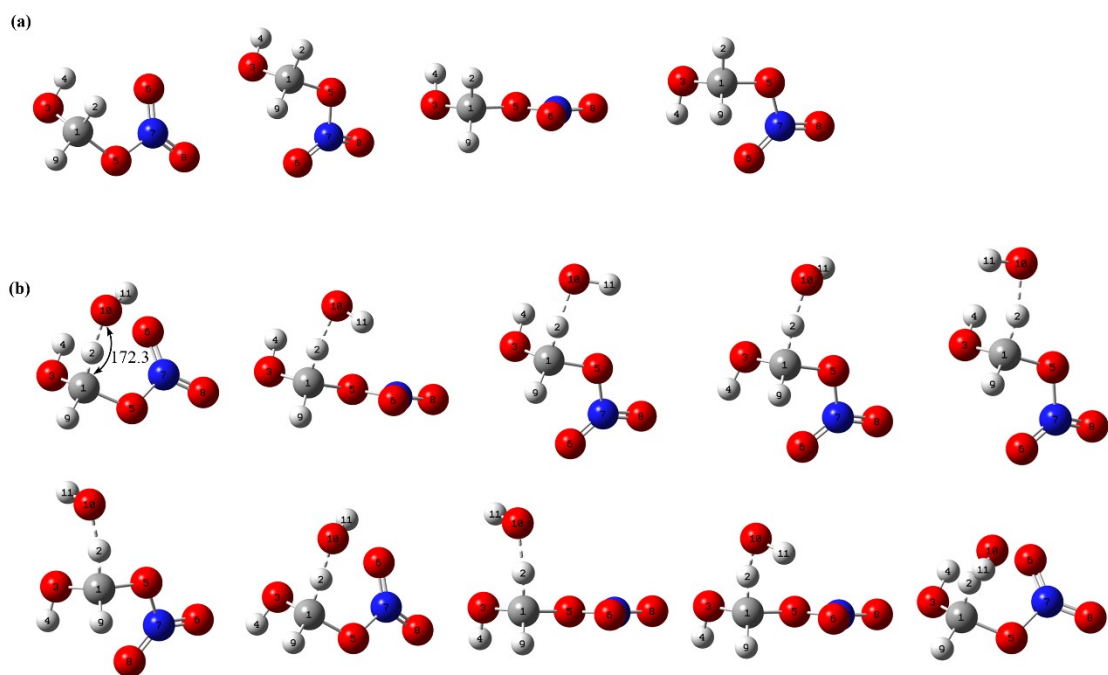

**Figure S4.** Geometric conformations of reactants and transition states optimized at the M06-2X/6-311+G(d,p) level.

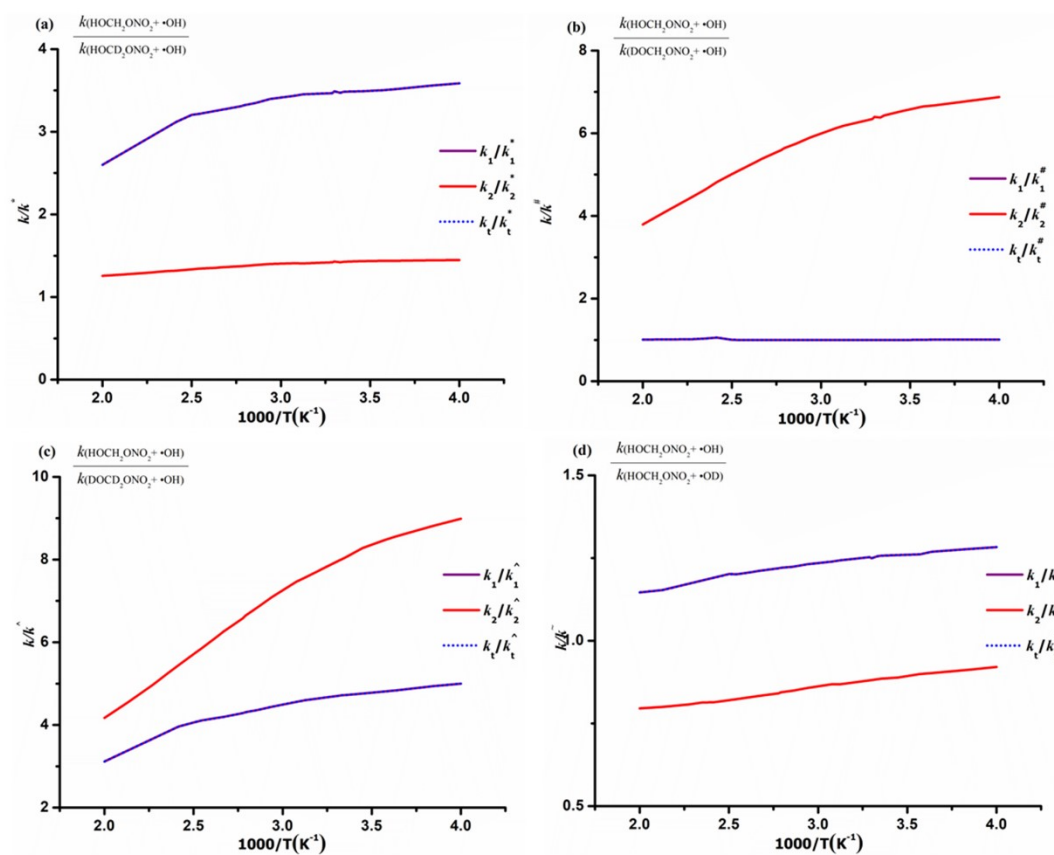

**Figure S5.** The  $k_H/k_D$  for the reactions of  $\text{HOCH}_2\text{ONO}_2/\text{HOCD}_2\text{ONO}_2 + \text{OH}$  ( $R^*$ ) (a),  $\text{HOCH}_2\text{ONO}_2/\text{DOCH}_2\text{ONO}_2 + \text{OH}$  ( $R^\#$ ) (b),  $\text{HOCH}_2\text{ONO}_2/\text{DOCD}_2\text{ONO}_2 + \text{OH}$  ( $R^\wedge$ ) (c), and  $\text{HOCH}_2\text{ONO}_2 + \text{OH}/\text{OD}$  ( $R^-$ ) (d).

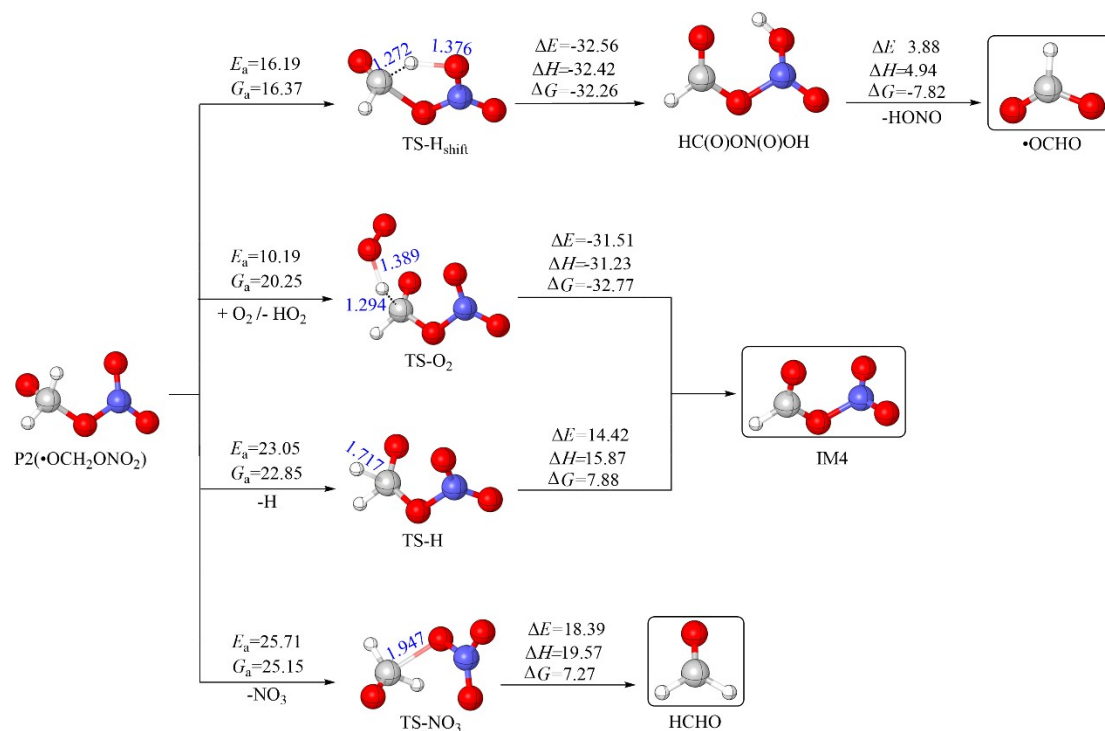

**Figure S6.** The degradation routes of  $\cdot$ OCH<sub>2</sub>ONO<sub>2</sub> (P2) and the corresponding geometries (Bond length: Å) along with the activation energy ( $E_a$ ), activation Gibbs free energy ( $G_a$ ), relative energies ( $\Delta E$ ), enthalpy ( $\Delta H$ ), and Gibbs free energy ( $\Delta G$ ) of the transformation processes at the M06-2X/6-311+G(d,p) level.

**Table S1.** Computed relative energies ( $\Delta E$ ) including ZPE corrections, enthalpy ( $\Delta H$ ), and Gibbs free energy ( $\Delta G$ ) for species involved reaction of  $\cdot\text{OH}$  radical with  $\text{HOCH}_2\text{ONO}_2$  at the CCSD(T)/aug-cc-pVDZ, CCSD(T)/aug-cc-pVTZ, and CCSD(T)/CBS levels of theory based on the M06-2X/6-311+G(d,p)-optimized geometries.

| Species                  | Parameters |        |        | $\Delta E$ |        |         | $\Delta H$ |        |         | $\Delta G$ |     |     |     |
|--------------------------|------------|--------|--------|------------|--------|---------|------------|--------|---------|------------|-----|-----|-----|
|                          | Levels     | DZ     | TZ     | CBS        | DZ     | TZ      | CBS        | DZ     | TZ      | CBS        | DZ  | TZ  | CBS |
| R+ $\cdot\text{OH}$      |            | 0.0    | 0.0    | 0.0        | 0.0    | 0.0     | 0.0        | 0.0    | 0.0     | 0.0        | 0.0 | 0.0 | 0.0 |
| RC1-2                    |            | -3.99  | -3.99  | -3.99      | -4.22  | -4.22   | -4.22      | 3.24   | 3.25    | 3.25       |     |     |     |
| TS1                      |            | 1.35   | 1.39   | 1.44       | 0.56   | 0.60    | 0.64       | 9.58   | 9.62    | 9.66       |     |     |     |
| PC1                      |            | -18.69 | -19.97 | -21.27     | -18.34 | -19.62  | -20.92     | -11.71 | -12.98  | -14.28     |     |     |     |
| P1+ $\text{H}_2\text{O}$ |            | -16.00 | -17.79 | -19.61     | -15.60 | -66.66  | -19.22     | -16.93 | -67.99  | -20.54     |     |     |     |
| TS2                      |            | 17.31  | 16.20  | 15.06      | 16.48  | 15.37   | 14.23      | 25.67  | 24.56   | 23.42      |     |     |     |
| PC2                      |            | -13.45 | -13.72 | -13.99     | -13.32 | -13.58  | -13.86     | -6.73  | -7.00   | -7.27      |     |     |     |
| P2+ $\text{H}_2\text{O}$ |            | -10.30 | -10.73 | -11.17     | -10.00 | -59.70  | -10.87     | -11.35 | -61.05  | -12.22     |     |     |     |
| RC3-6                    |            | -3.10  | -2.72  | -2.32      | -3.12  | -2.73   | -2.34      | 3.84   | 4.23    | 4.62       |     |     |     |
| TS3                      |            | 23.73  | 25.46  | 27.23      | 23.48  | 25.21   | 26.98      | 31.14  | 32.87   | 34.63      |     |     |     |
| PC3                      |            | -3.12  | -4.26  | -5.42      | -2.94  | -4.08   | -5.24      | 3.38   | 2.25    | 1.08       |     |     |     |
| P3+ $\text{NO}_2$        |            | -0.27  | -2.01  | -3.79      | -0.41  | -2.14   | -3.92      | -3.18  | -4.92   | -6.70      |     |     |     |
| RC4                      |            | -2.57  | -2.49  | -2.41      | -2.86  | -2.78   | -2.70      | 4.43   | 4.51    | 4.59       |     |     |     |
| TS4                      |            | 36.87  | 38.02  | 39.21      | 36.32  | 37.48   | 38.67      | 44.87  | 46.03   | 47.21      |     |     |     |
| PC4                      |            | -10.01 | -9.93  | -9.85      | -10.02 | -9.94   | -9.86      | -3.34  | -3.26   | -3.18      |     |     |     |
| P4+ $\text{NO}_3$        |            | -6.19  | -6.82  | -7.46      | -6.57  | -7.20   | -7.84      | -9.27  | -9.90   | -10.54     |     |     |     |
| RC5                      |            | -2.78  | -2.37  | -1.96      | -2.95  | -2.55   | -2.14      | 4.94   | 5.35    | 5.76       |     |     |     |
| TS5                      |            | 27.50  | 29.88  | 32.32      | 26.52  | 28.91   | 31.35      | 36.55  | 38.94   | 41.38      |     |     |     |
| PC5                      |            | -10.92 | -11.69 | -12.48     | -11.00 | -11.77  | -12.56     | -4.12  | -4.90   | -5.68      |     |     |     |
| P5+ $\text{HNO}_3$       |            | -6.25  | -7.57  | -8.91      | -6.62  | -207.70 | -9.29      | -9.34  | -210.41 | -12.01     |     |     |     |
| TS6                      |            | 33.29  | 33.87  | 34.47      | 31.97  | 32.55   | 33.14      | 42.50  | 43.08   | 43.68      |     |     |     |
| P6                       |            | 30.89  | 30.31  | 29.72      | 29.67  | 29.09   | 28.50      | 40.08  | 39.50   | 38.91      |     |     |     |



**Table S2.** The values of variational and tunneling transmission coefficients for the major channel RP1 of  $\cdot\text{OH}$  radical with  $\text{HOCH}_2\text{ONO}_2$  in the temperature range of 200—600 K.

| $T$ (K) | $TST/CVT$ | $(CVT/SCT)/CVT$ |
|---------|-----------|-----------------|
| 200     | 1.67      | 23.11           |
| 220     | 1.51      | 14.95           |
| 221     | 1.50      | 14.60           |
| 225     | 1.48      | 13.52           |
| 240     | 1.39      | 10.39           |
| 250     | 1.35      | 8.87            |
| 260     | 1.31      | 7.69            |
| 275     | 1.26      | 6.34            |
| 280     | 1.24      | 5.98            |
| 290     | 1.22      | 5.37            |
| 298     | 1.20      | 4.95            |
| 300     | 1.19      | 4.86            |
| 303     | 1.19      | 4.72            |
| 304     | 1.18      | 4.68            |
| 320     | 1.15      | 4.08            |
| 325     | 1.14      | 3.91            |
| 340     | 1.12      | 3.49            |
| 350     | 1.10      | 3.27            |
| 358     | 1.10      | 3.10            |
| 360     | 1.09      | 3.04            |
| 375     | 1.08      | 2.79            |
| 380     | 1.07      | 2.71            |
| 393     | 1.05      | 2.53            |
| 400     | 1.05      | 2.45            |
| 414     | 1.03      | 2.27            |
| 425     | 1.03      | 2.03            |
| 440     | 1.02      | 1.83            |
| 470     | 1.01      | 1.58            |
| 500     | 1.01      | 1.42            |
| 520     | 1.01      | 1.34            |
| 560     | 1.00      | 1.23            |
| 600     | 1.00      | 1.14            |

**Table S3.** Branching ratios of  $k_1/k_t$  and  $k_2/k_t$  at 200–600 K.

| $T$ (K) | $k_1/k_t$ | $k_2/k_t$ |
|---------|-----------|-----------|
| 200     | 100%      | 0%        |
| 220     | 100%      | 0%        |
| 221     | 100%      | 0%        |
| 225     | 100%      | 0%        |
| 240     | 100%      | 0%        |
| 250     | 100%      | 0%        |
| 260     | 100%      | 0%        |
| 275     | 100%      | 0%        |
| 280     | 100%      | 0%        |
| 290     | 100%      | 0%        |
| 298     | 100%      | 0%        |
| 300     | 100%      | 0%        |
| 303     | 100%      | 0%        |
| 304     | 100%      | 0%        |
| 320     | 100%      | 0%        |
| 325     | 100%      | 0%        |
| 340     | 100%      | 0%        |
| 350     | 100%      | 0%        |
| 358     | 100%      | 0%        |
| 360     | 100%      | 0%        |
| 375     | 100%      | 0%        |
| 380     | 100%      | 0%        |
| 393     | 100%      | 0%        |
| 400     | 100%      | 0%        |
| 414     | 100%      | 0%        |
| 425     | 100%      | 0%        |
| 440     | 100%      | 0%        |
| 470     | 100%      | 0%        |
| 500     | 100%      | 0%        |
| 520     | 100%      | 0%        |
| 560     | 100%      | 0%        |
| 600     | 100%      | 0%        |

**Table S4.** The  $k_{\text{H}}/k_{\text{D}}$  for the individual and overall reactions of  $\text{HOCH}_2\text{ONO}_2/\text{HOCD}_2\text{ONO}_2 + \cdot\text{OH}$  ( $\text{R}^*$ ) at 250–500 K.

| $T$ (K) | $k_1/k_1^*$ | $k_2/k_2^*$ | $k_t/k_t^*$ |
|---------|-------------|-------------|-------------|
| 250     | 3.59        | 1.45        | 3.59        |
| 260     | 3.56        | 1.45        | 3.56        |
| 275     | 3.52        | 1.44        | 3.52        |
| 280     | 3.50        | 1.44        | 3.50        |
| 290     | 3.49        | 1.43        | 3.49        |
| 298     | 3.49        | 1.43        | 3.49        |
| 300     | 3.47        | 1.42        | 3.47        |
| 303     | 3.49        | 1.43        | 3.49        |
| 304     | 3.47        | 1.42        | 3.47        |
| 320     | 3.45        | 1.41        | 3.45        |
| 325     | 3.44        | 1.41        | 3.44        |
| 340     | 3.40        | 1.40        | 3.40        |
| 350     | 3.35        | 1.39        | 3.35        |
| 358     | 3.32        | 1.38        | 3.32        |
| 360     | 3.31        | 1.37        | 3.31        |
| 375     | 3.25        | 1.36        | 3.25        |
| 380     | 3.23        | 1.35        | 3.23        |
| 393     | 3.22        | 1.34        | 3.22        |
| 400     | 3.20        | 1.33        | 3.20        |
| 414     | 3.12        | 1.32        | 3.12        |
| 425     | 2.93        | 1.31        | 2.93        |
| 440     | 2.74        | 1.30        | 2.74        |
| 470     | 2.55        | 1.28        | 2.55        |
| 500     | 2.60        | 1.26        | 2.60        |

**Table S5.** The  $k_{\text{H}}/k_{\text{D}}$  for the individual and overall reactions of  $\text{HOCH}_2\text{ONO}_2/\text{DOCH}_2\text{ONO}_2 + \text{OH}$  ( $\text{R}^\#$ ) at 250–500 K.

| $T$ (K) | $k_1/k_1^\#$ | $k_2/k_2^\#$ | $k_t/k_t^\#$ |
|---------|--------------|--------------|--------------|
| 250     | 1.01         | 6.88         | 1.01         |
| 260     | 1.01         | 6.79         | 1.01         |
| 275     | 1.01         | 6.67         | 1.01         |
| 280     | 1.00         | 6.65         | 1.00         |
| 290     | 1.00         | 6.53         | 1.00         |
| 298     | 1.00         | 6.43         | 1.00         |
| 300     | 1.00         | 6.38         | 1.00         |
| 303     | 1.00         | 6.39         | 1.00         |
| 304     | 1.00         | 6.34         | 1.00         |
| 320     | 1.00         | 6.18         | 1.00         |
| 325     | 1.00         | 6.11         | 1.00         |
| 340     | 1.00         | 5.90         | 1.00         |
| 350     | 1.00         | 5.74         | 1.00         |
| 358     | 1.00         | 5.64         | 1.00         |
| 360     | 1.00         | 5.60         | 1.00         |
| 375     | 1.00         | 5.38         | 1.00         |
| 380     | 1.00         | 5.30         | 1.00         |
| 393     | 1.00         | 5.11         | 1.00         |
| 400     | 1.00         | 5.01         | 1.00         |
| 414     | 1.06         | 4.82         | 1.06         |
| 425     | 1.03         | 4.64         | 1.03         |
| 440     | 1.02         | 4.45         | 1.02         |
| 470     | 1.01         | 4.10         | 1.01         |
| 500     | 1.01         | 3.79         | 1.01         |

**Table S6.** The  $k_{\text{H}}/k_{\text{D}}$  for the individual and overall reactions of  $\text{HOCH}_2\text{ONO}_2/\text{DOCD}_2\text{ONO}_2 + \text{OH}$  ( $R^\wedge$ ) at 250–500 K.

| $T$ (K) | $k_1/k_1^\wedge$ | $k_2/k_2^\wedge$ | $k_t/k_t^\wedge$ |
|---------|------------------|------------------|------------------|
| 250     | 5.00             | 8.99             | 5.00             |
| 260     | 4.94             | 8.82             | 4.94             |
| 275     | 4.83             | 8.56             | 4.83             |
| 280     | 4.81             | 8.47             | 4.81             |
| 290     | 4.76             | 8.28             | 4.76             |
| 298     | 4.72             | 8.06             | 4.72             |
| 300     | 4.72             | 7.99             | 4.72             |
| 303     | 4.70             | 8.01             | 4.70             |
| 304     | 4.69             | 7.92             | 4.69             |
| 320     | 4.60             | 7.56             | 4.60             |
| 325     | 4.56             | 7.47             | 4.56             |
| 340     | 4.44             | 7.09             | 4.44             |
| 350     | 4.36             | 6.84             | 4.36             |
| 358     | 4.31             | 6.65             | 4.31             |
| 360     | 4.29             | 6.58             | 4.29             |
| 375     | 4.19             | 6.25             | 4.19             |
| 380     | 4.17             | 6.13             | 4.17             |
| 393     | 4.11             | 5.85             | 4.11             |
| 400     | 4.06             | 5.71             | 4.06             |
| 414     | 3.96             | 5.44             | 3.96             |
| 425     | 3.65             | 5.24             | 3.65             |
| 440     | 3.40             | 4.98             | 3.40             |
| 470     | 3.13             | 4.54             | 3.13             |
| 500     | 3.12             | 4.17             | 3.12             |

**Table S7.** The  $k_{\text{H}}/k_{\text{D}}$  for the individual and overall reactions of  $\text{HOCH}_2\text{ONO}_2 + \text{OH/OD}$  ( $\text{R}^-$ ) at 250–500 K.

| $T$ (K) | $k_1/k_1^{\sim}$ | $k_2/k_2^{\sim}$ | $k_t/k_t^{\sim}$ |
|---------|------------------|------------------|------------------|
| 250     | 1.28             | 0.92             | 1.28             |
| 260     | 1.28             | 0.91             | 1.28             |
| 275     | 1.27             | 0.90             | 1.27             |
| 280     | 1.26             | 0.90             | 1.26             |
| 290     | 1.26             | 0.89             | 1.26             |
| 298     | 1.26             | 0.89             | 1.26             |
| 300     | 1.26             | 0.88             | 1.26             |
| 303     | 1.25             | 0.89             | 1.25             |
| 304     | 1.25             | 0.88             | 1.25             |
| 320     | 1.24             | 0.87             | 1.24             |
| 325     | 1.24             | 0.87             | 1.24             |
| 340     | 1.23             | 0.86             | 1.23             |
| 350     | 1.22             | 0.85             | 1.22             |
| 358     | 1.22             | 0.84             | 1.22             |
| 360     | 1.22             | 0.84             | 1.22             |
| 375     | 1.21             | 0.83             | 1.21             |
| 380     | 1.21             | 0.83             | 1.21             |
| 393     | 1.20             | 0.82             | 1.20             |
| 400     | 1.20             | 0.82             | 1.20             |
| 414     | 1.18             | 0.81             | 1.18             |
| 425     | 1.12             | 0.81             | 1.12             |
| 440     | 1.14             | 0.81             | 1.14             |
| 470     | 1.15             | 0.80             | 1.15             |
| 500     | 1.15             | 0.80             | 1.15             |

**Table S8.** The  $k_{\text{H}}/k_{\text{D}}$  for the overall reaction of  $\text{HOCH}_2\text{ONO}_2/\text{HOCD}_2\text{ONO}_2+\text{OH}$  ( $k_{\text{t}}/k_{\text{t}}^*$ ),  $\text{HOCH}_2\text{ONO}_2/\text{DOCH}_2\text{ONO}_2+\text{OH}$  ( $k_{\text{t}}/k_{\text{t}}^\#$ ),  $\text{HOCH}_2\text{ONO}_2/\text{DOCD}_2\text{ONO}_2+\text{OH}$  ( $k_{\text{t}}/\hat{k}_{\text{t}}$ ), and  $\text{HOCH}_2\text{ONO}_2 + \text{OH}/\text{OD}$  ( $k_{\text{t}}/\tilde{k}_{\text{t}}$ ) at 250–500 K.

| $T$ (K) | $k_{\text{t}}/k_{\text{t}}^*$ | $k_{\text{t}}/k_{\text{t}}^\#$ | $k_{\text{t}}/\hat{k}_{\text{t}}$ | $k_{\text{t}}/\tilde{k}_{\text{t}}$ |
|---------|-------------------------------|--------------------------------|-----------------------------------|-------------------------------------|
| 250     | 5.00                          | 3.59                           | 1.01                              | 1.28                                |
| 260     | 4.94                          | 3.56                           | 1.01                              | 1.28                                |
| 275     | 4.83                          | 3.52                           | 1.01                              | 1.27                                |
| 280     | 4.81                          | 3.50                           | 1.00                              | 1.26                                |
| 290     | 4.76                          | 3.49                           | 1.00                              | 1.26                                |
| 298     | 4.72                          | 3.49                           | 1.00                              | 1.26                                |
| 300     | 4.72                          | 3.47                           | 1.00                              | 1.26                                |
| 303     | 4.70                          | 3.49                           | 1.00                              | 1.25                                |
| 304     | 4.69                          | 3.47                           | 1.00                              | 1.25                                |
| 320     | 4.60                          | 3.45                           | 1.00                              | 1.24                                |
| 325     | 4.56                          | 3.44                           | 1.00                              | 1.24                                |
| 340     | 4.44                          | 3.40                           | 1.00                              | 1.23                                |
| 350     | 4.36                          | 3.35                           | 1.00                              | 1.22                                |
| 358     | 4.31                          | 3.32                           | 1.00                              | 1.22                                |
| 360     | 4.29                          | 3.31                           | 1.00                              | 1.22                                |
| 375     | 4.19                          | 3.25                           | 1.00                              | 1.21                                |
| 380     | 4.17                          | 3.23                           | 1.00                              | 1.21                                |
| 393     | 4.11                          | 3.22                           | 1.00                              | 1.20                                |
| 400     | 4.06                          | 3.20                           | 1.00                              | 1.20                                |
| 414     | 3.96                          | 3.12                           | 1.06                              | 1.18                                |
| 425     | 3.65                          | 2.93                           | 1.03                              | 1.12                                |
| 440     | 3.40                          | 2.74                           | 1.02                              | 1.14                                |
| 470     | 3.13                          | 2.55                           | 1.01                              | 1.15                                |
| 500     | 3.12                          | 2.60                           | 1.01                              | 1.15                                |
